# Supplementary material for: Chromosome transplantation as a novel approach for correcting complex genomic disorders
Source: PubMed Central journal article supplement (PMC4742100; doi:10.18632/oncotarget.6143), 2015-10-17
Supplement: oncotarget-06-35218-s001.pdf [file oncotarget-06-35218-s001.pdf]

## Chromosome transplantation as a novel approach for correcting complex genomic disorders

### Supplementary Material

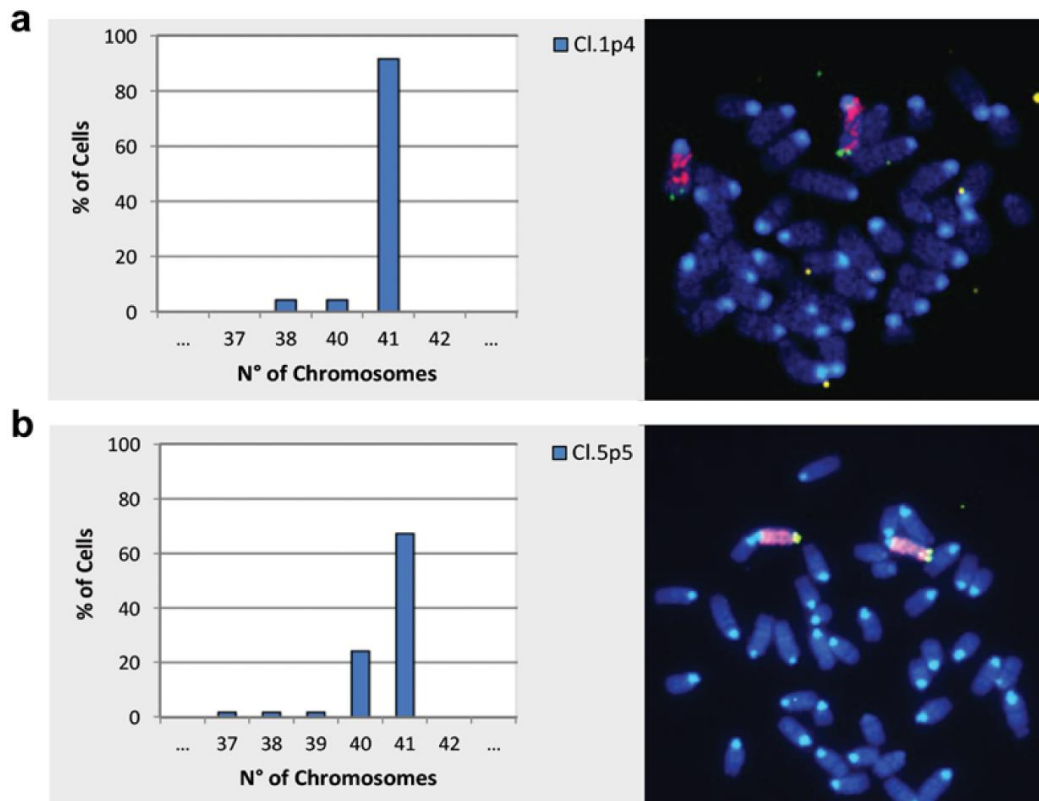

**Supplemental Figure 1: Cytogenetic analysis of HAT-resistant E14TG2a-derived clones after MMCT. (a,b)** Left: Chromosome number distributions; right: FISH metaphase spreads of the two clones. Whole mouse X chromosome painting (red) and X-linked BAC-RP23-113K2 (green) were used as probes. (n=50 each). All passage numbers are indicated with p.

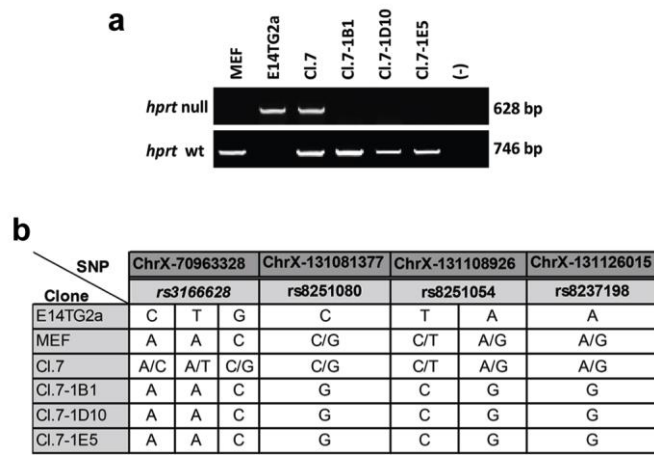

**Supplemental Figure 2: Molecular analysis of the tXY subclones.** (a) Genomic PCR of *Hprt* gene on the indicated clones. E14TG2a is the positive control of the mutated (null) locus; MEF is the positive control of the wild type (wt) locus. (b) Analysis of SNPs mapped to the X chromosome performed on the indicated samples.

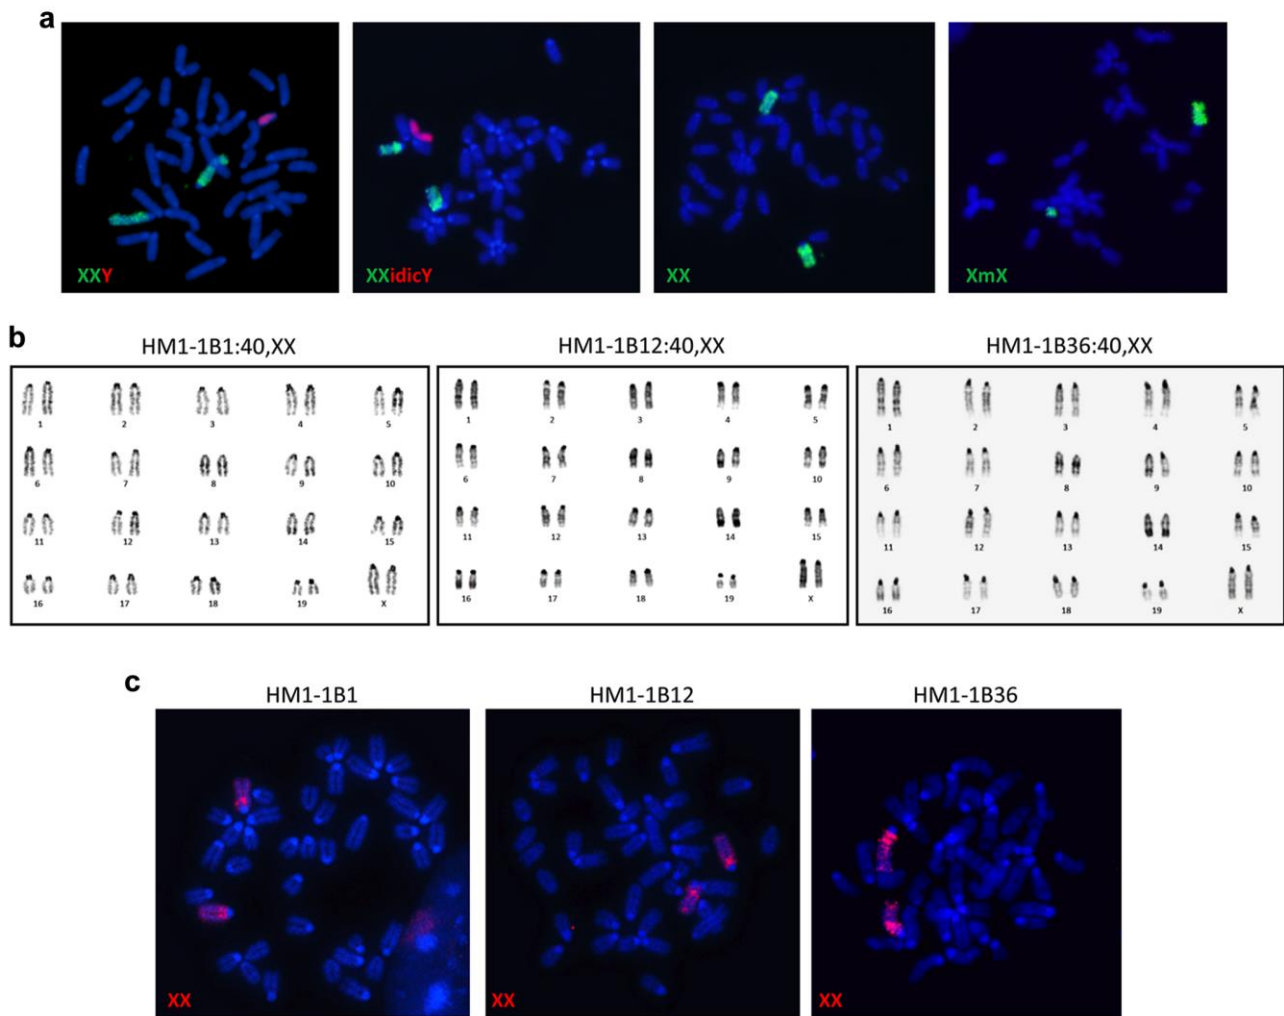

**Supplemental Figure 3: Cytogenetic analysis of the sXX subclones.** (a) Representative FISH metaphase spreads of the most frequent populations of the HM1-1B clone. Whole mouse X chromosome painting (green) and Y chromosome painting (red) were used as probes. idicY: isodicentric Y chromosome; mX: X chromosome marker. (b) Representative inverted DAPI-banded karyotypes. (c) Representative FISH metaphase spreads. Whole mouse X chromosome painting (red) was used as probe.

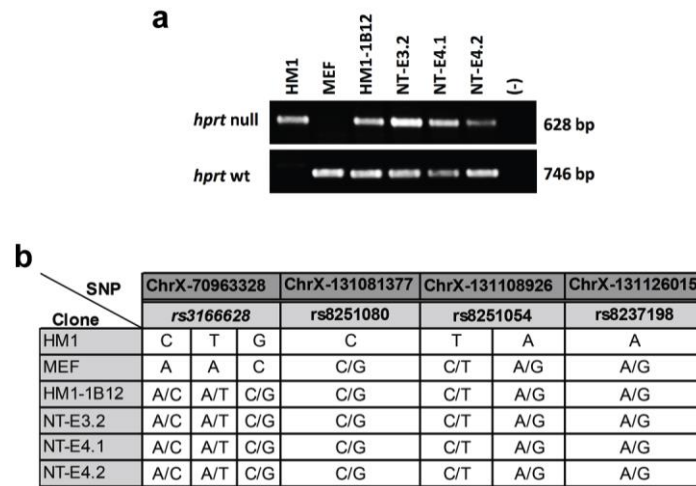

**Supplemental Figure 4: Molecular analysis of the rejuvenated NT-clones.** (a) Genomic PCR detecting both forms of the *Hprt* locus on the indicated samples. HM1 is the positive control of the mutated (null) locus; MEF is the positive control of the wt locus; HM1-1B12 is the positive control of both loci. (b) Analysis of SNPs mapped to the X chromosome performed on the rejuvenated NT-clones.

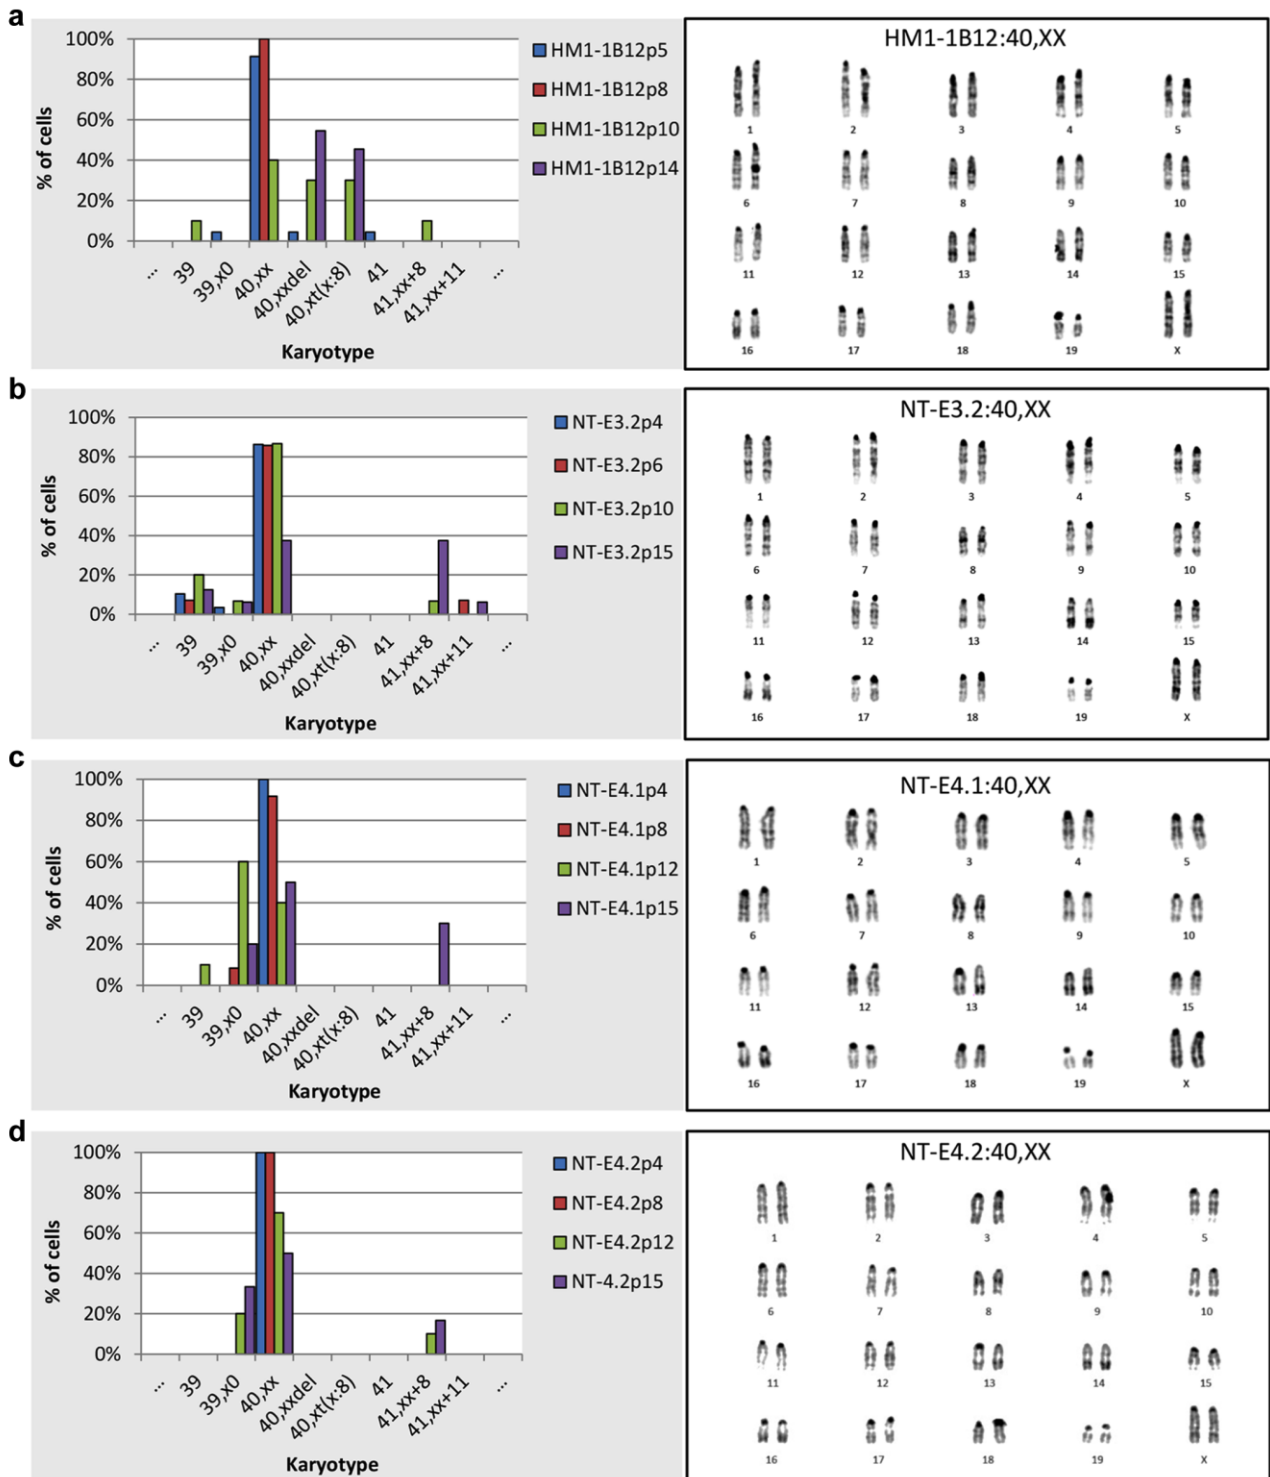

**Supplemental Figure 5: Cytogenetic analysis of the HM1-1B12 subclone and its derivative rejuvenated NT-clones.** (a) On the left, frequency of the karyotypes of the HM1-1B12 subclone at various passages; on the right, a representative karyotype of the most frequent cell population (inverted DAPI-banded). (b,c,d) On the left, frequency of the karyotypes and on the right a representative karyotype of the most frequent cell population (inverted DAPI-banded) of the indicated NT-clones. (n= 20 each). All passage numbers are indicated with p.

**Table 1**

| Primers for genomic PCR |                               |               |             |
|-------------------------|-------------------------------|---------------|-------------|
| Name                    | Primer Sequence               | Amplicon Size | Annealing T |
| rs3166628               | F:5'-TACATGCACTCTCGAGTGGT-3'  | 261bp         | 55°C        |
|                         | R:5'-CCAATGGTGCCATTTCTCCA-3'  |               |             |
| rs8251054               | F:5'-TCTGCCTGAGCTCCTTCTTC-3'  | 200bp         | 54°C        |
|                         | F:5'-AGTTCAATCCCAGCAACCA-3'   |               |             |
| rs8237198               | F:5'-GGAGTCTAACGCCATTGTCC-3'  | 201bp         | 55°C        |
|                         | R:5'-TGTA CTTCATGGCCTGCTGA-3' |               |             |
| rs8251080               | F:5'-AGGCATTGACTAGCCAGCAG-3'  | 295bp         | 55°C        |
|                         | R:5'-AGCCATATTGGCATCCTCAC-3'  |               |             |
| mSRY                    | F:5'-TGCTCCTGGTATGGTGTATG-3'  | 863bp         | 58°C        |
|                         | R:5'-CTGTACAACCTTCTGCAGTG-3'  |               |             |

**Supplemental Table 1.** Primers for genomic PCR.

**Table 2**

| Primers for RT-PCR |            |                              |               |             |
|--------------------|------------|------------------------------|---------------|-------------|
| Name               | Accession# | Primer Sequence              | Amplicon Size | Annealing T |
| Nestin             | NM_016701  | F:5'-AGGAACCAAAAGAGGCAGGT-3' | 230bp         | 58°C        |
|                    |            | R:5'-CTTGGGACCAGGGACTGTTA-3' |               |             |
| Bmp2               | NM_007553  | F:5'-GCTCCACAAACGAGAAAAGC-3' | 178bp         | 58°C        |
|                    |            | R:5'-AGCAAGGGGAAAAGGACACT-3' |               |             |
| AFP                | NM_007423  | F:5'-ATGAAGCAAGCCCTGTGAAC-3' | 158bp         | 58°C        |
|                    |            | R:5'-AGCTTGCCACAGATCCTTGT-3' |               |             |
| GAPDH              | NM_008084  | F:5'-TGTCAGCAATGCATCCTGCA-3' | 196bp         | 58°C        |
|                    |            | R:5'-TGGATGCAGGGATGATGTTC-3' |               |             |

**Supplemental Table 2.** Primers for Real Time PCR.
